# Supplementary figures and images for: Genome-Wide Analysis of the MADS-box Gene Family and Expression Analysis during Anther Development in Salvia miltiorrhiza
Source: MDPI journal article supplement (doi:10.3390/ijms241310937), 2023-06-30

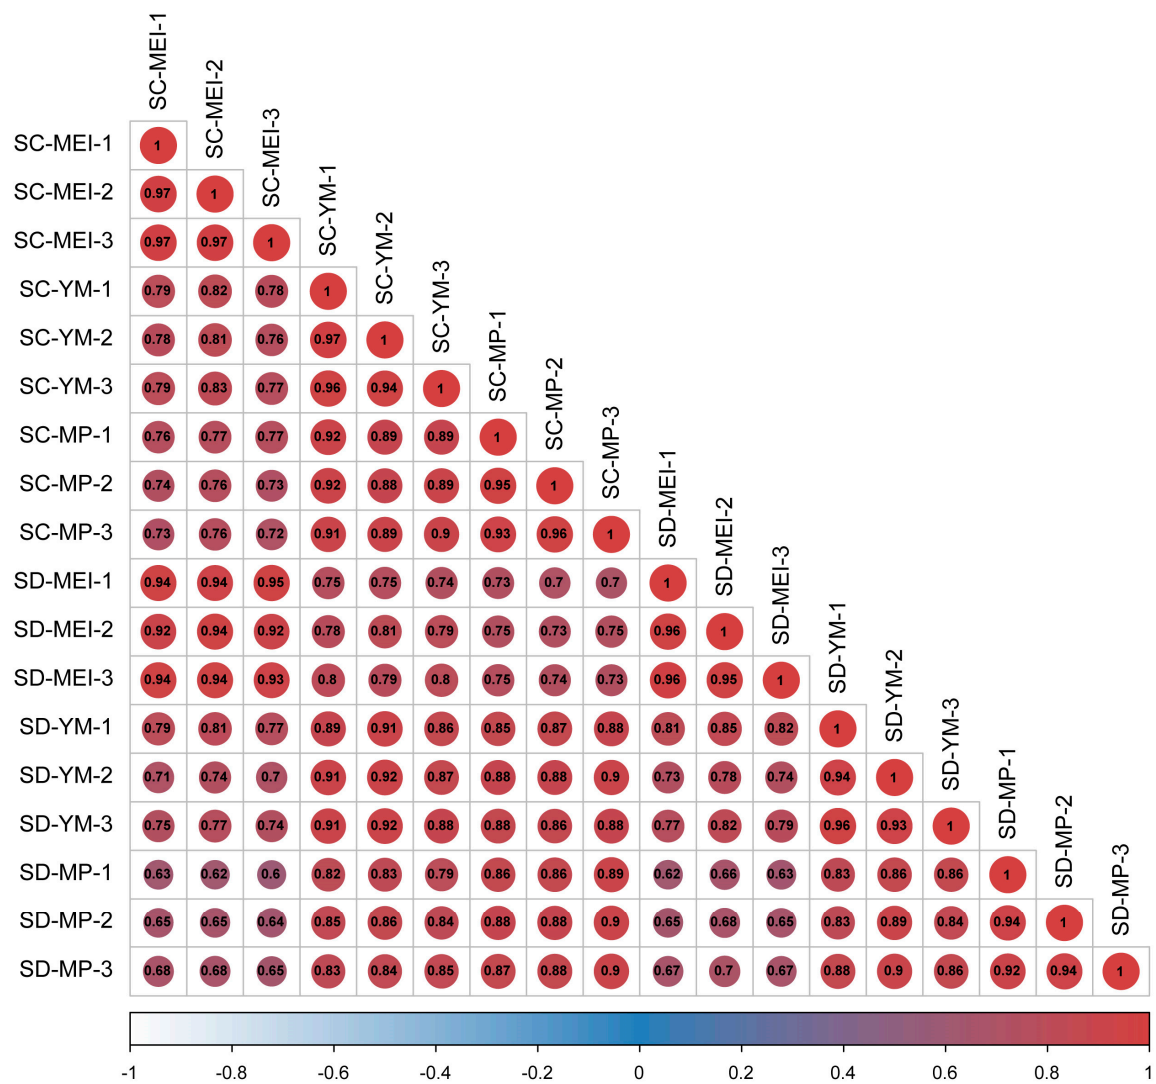

**Figure S1:** Correlation analysis between transcriptome data of each sample.

Supplement: s1 [file s1]
